# Supplementary material for: Unattended Trapping of Whiteflies Driven out of Tomato Plants onto a Yellow-Colored Double-Charged Dipolar Electric Field Screen
Source: MDPI journal article supplement (doi:10.3390/horticulturae8090764), 2022-08-25
Supplement: s1 [file s1]

Archive with 2 entries (2 files):
- Video S1.mp4
- Figure Supplements.pdf
